# Supplementary material
Source: MDPI journal article supplement (https://www.mdpi.com/2225-1154/10/11/172)
Supplement: s1 [file s1 › climate-1956730-supplementary.pdf]

Table S1. Case Processing Summary

|                                                   | Cases |         |         |         |       |         |
|---------------------------------------------------|-------|---------|---------|---------|-------|---------|
|                                                   | Valid |         | Missing |         | Total |         |
|                                                   | N     | Percent | N       | Percent | N     | Percent |
| Gender *<br>Vulnerability_to_shifting_cultivation | 320   | 100.0%  | 0       | .0%     | 320   | 100.0%  |

Table S2. Gender \* Vulnerability\_to\_shifting\_cultivation Crosstabulation

|        |                 |                 | Vulnerability_to_shifting_cultivation |      |           | Total  |
|--------|-----------------|-----------------|---------------------------------------|------|-----------|--------|
|        |                 |                 | yes                                   | no   | dont know |        |
| Gender | male            | Count           | 193                                   | 2    | 27        | 222    |
|        |                 | Expected Count  | 192.9                                 | 2.1  | 27.1      | 222.0  |
|        |                 | % within Gender | 86.9%                                 | .9%  | 12.2%     | 100.0% |
|        | female          | Count           | 85                                    | 1    | 12        | 98     |
|        |                 | Expected Count  | 85.1                                  | .9   | 11.9      | 98.0   |
|        |                 | % within Gender | 86.7%                                 | 1.0% | 12.2%     | 100.0% |
| Total  | Count           |                 | 278                                   | 3    | 39        | 320    |
|        | Expected Count  |                 | 278.0                                 | 3.0  | 39.0      | 320.0  |
|        | % within Gender |                 | 86.9%                                 | .9%  | 12.2%     | 100.0% |

Table S3. Chi-Square Tests

|                              | Value             | df | Asymp. Sig. (2-sided) |
|------------------------------|-------------------|----|-----------------------|
| Pearson Chi-Square           | .011 <sup>a</sup> | 2  | .994                  |
| Likelihood Ratio             | .011              | 2  | .995                  |
| Linear-by-Linear Association | .001              | 1  | .972                  |
| N of Valid Cases             | 320               |    |                       |

a. 2 cells (33.3%) have expected count less than 5. The minimum expected count is .92.

Table S4. Symmetric Measures

|                        | Value | Approx. Sig. |
|------------------------|-------|--------------|
| Nominal by Nominal Phi | .006  | .994         |
| Cramer's V             | .006  | .994         |
| N of Valid Cases       | 320   |              |

Table S5. Case Processing Summary

|                                                                              | Cases            |         |         |         |       |         |
|------------------------------------------------------------------------------|------------------|---------|---------|---------|-------|---------|
|                                                                              | Valid            |         | Missing |         | Total |         |
|                                                                              | N                | Percent | N       | Percent | N     | Percent |
| Frequency *<br>Vulnerability_of_population_type_to_shifting_climate_patterns | 320 <sup>a</sup> | 100.0%  | 0       | .0%     | 320   | 100.0%  |

a. Number of valid cases is different from the total count in the crosstabulation table because the cell counts have been rounded.

Table S6. Frequency \* Vulnerability\_of\_population\_type\_to\_shifting\_climate\_patterns Crosstabulation

|           |       |                    | Vulnerability_of_population_type_to_shifting_climate_patterns |        |           | Total  |
|-----------|-------|--------------------|---------------------------------------------------------------|--------|-----------|--------|
|           |       |                    | yes                                                           | no     | dont know |        |
| Frequency | 0.992 | Count              | 0                                                             | 1      | 0         | 1      |
|           |       | Expected Count     | .9                                                            | .0     | .1        | 1.0    |
|           |       | % within Frequency | .0%                                                           | 100.0% | .0%       | 100.0% |
| 2.208     |       | Count              | 0                                                             | 2      | 0         | 2      |
|           |       | Expected Count     | 1.7                                                           | .0     | .2        | 2.0    |
|           |       | % within Frequency | .0%                                                           | 100.0% | .0%       | 100.0% |
| 11.776    |       | Count              | 0                                                             | 0      | 12        | 12     |
|           |       | Expected Count     | 10.4                                                          | .1     | 1.5       | 12.0   |
|           |       | % within Frequency | .0%                                                           | .0%    | 100.0%    | 100.0% |
| 26.624    |       | Count              | 0                                                             | 0      | 27        | 27     |
|           |       | Expected Count     | 23.5                                                          | .3     | 3.3       | 27.0   |
|           |       | % within Frequency | .0%                                                           | .0%    | 100.0%    | 100.0% |
| 85.248    |       | Count              | 85                                                            | 0      | 0         | 85     |
|           |       | Expected Count     | 73.8                                                          | .8     | 10.4      | 85.0   |
|           |       | % within Frequency | 100.0%                                                        | .0%    | .0%       | 100.0% |
| 193.152   |       | Count              | 193                                                           | 0      | 0         | 193    |
|           |       | Expected Count     | 167.7                                                         | 1.8    | 23.5      | 193.0  |
|           |       | % within Frequency | 100.0%                                                        | .0%    | .0%       | 100.0% |
| Total     |       | Count              | 278                                                           | 3      | 39        | 320    |
|           |       | Expected Count     | 278.0                                                         | 3.0    | 39.0      | 320.0  |
|           |       | % within Frequency | 86.9%                                                         | .9%    | 12.2%     | 100.0% |

Table S7. Chi-Square Tests

|                              | Value                | df | Asymp. Sig. (2-sided) |
|------------------------------|----------------------|----|-----------------------|
| Pearson Chi-Square           | 6.400E2 <sup>a</sup> | 10 | .000                  |
| Likelihood Ratio             | 270.419              | 10 | .000                  |
| Linear-by-Linear Association | 156.765              | 1  | .000                  |
| N of Valid Cases             | 320                  |    |                       |

a. 12 cells (66.7%) have expected count less than 5. The minimum expected count is .01.

Table S8. Symmetric Measures

|                        | Value | Approx. Sig. |
|------------------------|-------|--------------|
| Nominal by Nominal Phi | 1.414 | .000         |
| Cramer's V             | 1.000 | .000         |
| N of Valid Cases       | 320   |              |

Table S9. Case Processing Summary

|                                                | Cases                |         |         |         |         |         |
|------------------------------------------------|----------------------|---------|---------|---------|---------|---------|
|                                                | Valid                |         | Missing |         | Total   |         |
|                                                | N                    | Percent | N       | Percent | N       | Percent |
| Gender *<br>Women_that_do_not_know_how_to_swim | 3.200E2 <sup>a</sup> | 100.0%  | 0       | .0%     | 319.998 | 100.0%  |

a. Number of valid cases is different from the total count in the crosstabulation table because the cell counts have been rounded.

Table S10. Gender \* Women\_that\_do\_not\_know\_how\_to\_swim Crosstabulation

|        |                 |                 | Women_that_do_not_know_how_to_swim |       | Total  |
|--------|-----------------|-----------------|------------------------------------|-------|--------|
|        |                 |                 | yes                                | no    |        |
| Gender | male            | Count           | 54                                 | 168   | 222    |
|        |                 | Expected Count  | 45.1                               | 176.9 | 222.0  |
|        |                 | % within Gender | 24.3%                              | 75.7% | 100.0% |
|        | female          | Count           | 11                                 | 87    | 98     |
|        |                 | Expected Count  | 19.9                               | 78.1  | 98.0   |
|        |                 | % within Gender | 11.2%                              | 88.8% | 100.0% |
| Total  | Count           |                 | 65                                 | 255   | 320    |
|        | Expected Count  |                 | 65.0                               | 255.0 | 320.0  |
|        | % within Gender |                 | 20.3%                              | 79.7% | 100.0% |

Table S11. Chi-Square Tests

|                                    | Value              | df | Asymp. Sig. (2-sided) | Exact Sig. (2-sided) | Exact Sig. (1-sided) |
|------------------------------------|--------------------|----|-----------------------|----------------------|----------------------|
| Pearson Chi-Square                 | 7.208 <sup>a</sup> | 1  | .007                  | .007                 | .004                 |
| Continuity Correction <sup>b</sup> | 6.421              | 1  | .011                  |                      |                      |
| Likelihood Ratio                   | 7.852              | 1  | .005                  |                      |                      |
| Fisher's Exact Test                |                    |    |                       |                      |                      |
| Linear-by-Linear Association       | 7.185              | 1  | .007                  |                      |                      |
| N of Valid Cases <sup>b</sup>      | 320                |    |                       |                      |                      |

a. 0 cells (.0%) have expected count less than 5. The minimum expected count is 19.91.

Table S12. Symmetric Measures

|                        | Value | Approx. Sig. |
|------------------------|-------|--------------|
| Nominal by Nominal Phi | .150  | .007         |
| Cramer's V             | .150  | .007         |
| N of Valid Cases       | 320   |              |

Table S13. Case Processing Summary

|                                | Cases |         |         |         |       |         |
|--------------------------------|-------|---------|---------|---------|-------|---------|
|                                | Valid |         | Missing |         | Total |         |
|                                | N     | Percent | N       | Percent | N     | Percent |
| Gender * Water_and_food_issues | 320   | 100.0%  | 0       | .0%     | 320   | 100.0%  |

Table S14. Gender \* Water\_and\_food\_issues Crosstabulation

|        |                 |                 | Water_and_food_issues |       | Total  |
|--------|-----------------|-----------------|-----------------------|-------|--------|
|        |                 |                 | yes                   | no    |        |
| Gender | male            | Count           | 67                    | 155   | 222    |
|        |                 | Expected Count  | 55.5                  | 166.5 | 222.0  |
|        |                 | % within Gender | 30.2%                 | 69.8% | 100.0% |
|        | female          | Count           | 13                    | 85    | 98     |
|        |                 | Expected Count  | 24.5                  | 73.5  | 98.0   |
|        |                 | % within Gender | 13.3%                 | 86.7% | 100.0% |
| Total  | Count           |                 | 80                    | 240   | 320    |
|        | Expected Count  |                 | 80.0                  | 240.0 | 320.0  |
|        | % within Gender |                 | 25.0%                 | 75.0% | 100.0% |

Table S15. Chi-Square Tests

|                                    | Value               | df | Asymp. Sig. (2-sided) | Exact Sig. (2-sided) | Exact Sig. (1-sided) |
|------------------------------------|---------------------|----|-----------------------|----------------------|----------------------|
| Pearson Chi-Square                 | 10.374 <sup>a</sup> | 1  | .001                  | .001                 | .001                 |
| Continuity Correction <sup>b</sup> | 9.492               | 1  | .002                  |                      |                      |
| Likelihood Ratio                   | 11.282              | 1  | .001                  |                      |                      |
| Fisher's Exact Test                |                     |    |                       |                      |                      |
| Linear-by-Linear Association       | 10.342              | 1  | .001                  |                      |                      |
| N of Valid Cases <sup>b</sup>      | 320                 |    |                       |                      |                      |

a. 0 cells (.0%) have expected count less than 5. The minimum expected count is 24.50.

Table S16. ymmetric Measures

|                             | Value | Approx. Sig. |
|-----------------------------|-------|--------------|
| Nominal by Nominal      Phi | .180  | .001         |
| Cramer's V                  | .180  | .001         |
| N of Valid Cases            | 320   |              |

Table S17. Case Processing Summary

|                                              | Cases                |         |         |         |         |         |
|----------------------------------------------|----------------------|---------|---------|---------|---------|---------|
|                                              | Valid                |         | Missing |         | Total   |         |
|                                              | N                    | Percent | N       | Percent | N       | Percent |
| Gender *<br>Cyclone_shelter_is_far_from_home | 3.200E2 <sup>a</sup> | 100.0%  | 0       | .0%     | 319.998 | 100.0%  |

a. Number of valid cases is different from the total count in the crosstabulation table because the cell counts have been rounded.

Table S18. Gender \* Cyclone\_shelter\_is\_far\_from\_home Crosstabulation

|        |                 |                 | Cyclone_shelter_is_far_from_home |       | Total  |
|--------|-----------------|-----------------|----------------------------------|-------|--------|
|        |                 |                 | yes                              | no    |        |
| Gender | male            | Count           | 85                               | 137   | 222    |
|        |                 | Expected Count  | 70.8                             | 151.2 | 222.0  |
|        |                 | % within Gender | 38.3%                            | 61.7% | 100.0% |
|        | female          | Count           | 17                               | 81    | 98     |
|        |                 | Expected Count  | 31.2                             | 66.8  | 98.0   |
|        |                 | % within Gender | 17.3%                            | 82.7% | 100.0% |
| Total  | Count           |                 | 102                              | 218   | 320    |
|        | Expected Count  |                 | 102.0                            | 218.0 | 320.0  |
|        | % within Gender |                 | 31.9%                            | 68.1% | 100.0% |

Table S19. Chi-Square Tests

|                                    | Value               | df | Asymp. Sig. (2-sided) | Exact Sig. (2-sided) | Exact Sig. (1-sided) |
|------------------------------------|---------------------|----|-----------------------|----------------------|----------------------|
| Pearson Chi-Square                 | 13.730 <sup>a</sup> | 1  | .000                  | .000                 | .000                 |
| Continuity Correction <sup>b</sup> | 12.783              | 1  | .000                  |                      |                      |
| Likelihood Ratio                   | 14.704              | 1  | .000                  |                      |                      |
| Fisher's Exact Test                |                     |    |                       |                      |                      |
| Linear-by-Linear Association       | 13.687              | 1  | .000                  |                      |                      |
| N of Valid Cases <sup>b</sup>      | 320                 |    |                       |                      |                      |

a. 0 cells (.0%) have expected count less than 5. The minimum expected count is 31.24.

Table S20. Symmetric Measures

|                    |                  | Value | Approx. Sig. |
|--------------------|------------------|-------|--------------|
| Nominal by Nominal | Phi              | .207  | .000         |
|                    | Cramer's V       | .207  | .000         |
|                    | N of Valid Cases | 320   |              |

Table S21. Case Processing Summary

|                                                | Cases                |         |         |         |         |         |
|------------------------------------------------|----------------------|---------|---------|---------|---------|---------|
|                                                | Valid                |         | Missing |         | Total   |         |
|                                                | N                    | Percent | N       | Percent | N       | Percent |
| Gender *<br>Lack_of_high_places_to_build_homes | 3.200E2 <sup>a</sup> | 100.0%  | 0       | .0%     | 319.998 | 100.0%  |

a. Number of valid cases is different from the total count in the crosstabulation table because the cell counts have been rounded.

Table S22. Gender \* Lack\_of\_high\_places\_to\_build\_homes Crosstabulation

|        |                 |                 | Lack_of_high_places_to_build_homes |       | Total  |
|--------|-----------------|-----------------|------------------------------------|-------|--------|
|        |                 |                 | yes                                | no    |        |
| Gender | male            | Count           | 38                                 | 184   | 222    |
|        |                 | Expected Count  | 31.9                               | 190.1 | 222.0  |
|        |                 | % within Gender | 17.1%                              | 82.9% | 100.0% |
|        | female          | Count           | 8                                  | 90    | 98     |
|        |                 | Expected Count  | 14.1                               | 83.9  | 98.0   |
|        |                 | % within Gender | 8.2%                               | 91.8% | 100.0% |
| Total  | Count           |                 | 46                                 | 274   | 320    |
|        | Expected Count  |                 | 46.0                               | 274.0 | 320.0  |
|        | % within Gender |                 | 14.4%                              | 85.6% | 100.0% |

Table S23. Chi-Square Tests

|                                    | Value              | df | Asymp. Sig. (2-sided) | Exact Sig. (2-sided) | Exact Sig. (1-sided) |
|------------------------------------|--------------------|----|-----------------------|----------------------|----------------------|
| Pearson Chi-Square                 | 4.428 <sup>a</sup> | 1  | .035                  | .038                 | .023                 |
| Continuity Correction <sup>b</sup> | 3.731              | 1  | .053                  |                      |                      |
| Likelihood Ratio                   | 4.844              | 1  | .028                  |                      |                      |
| Fisher's Exact Test                |                    |    |                       |                      |                      |
| Linear-by-Linear Association       | 4.414              | 1  | .036                  |                      |                      |
| N of Valid Cases <sup>b</sup>      | 320                |    |                       |                      |                      |

a. 0 cells (.0%) have expected count less than 5. The minimum expected count is 14.09.

Table S24. Symmetric Measures

|                    |                  | Value | Approx. Sig. |
|--------------------|------------------|-------|--------------|
| Nominal by Nominal | Phi              | .118  | .035         |
|                    | Cramer's V       | .118  | .035         |
|                    | N of Valid Cases | 320   |              |

Table S25. Case Processing Summary

|                            | Cases                |         |         |         |         |         |
|----------------------------|----------------------|---------|---------|---------|---------|---------|
|                            | Valid                |         | Missing |         | Total   |         |
|                            | N                    | Percent | N       | Percent | N       | Percent |
| Gender * Physical_weakness | 3.200E2 <sup>a</sup> | 100.0%  | 0       | .0%     | 319.998 | 100.0%  |

a. Number of valid cases is different from the total count in the crosstabulation table because the cell counts have been rounded.

Table S26. Gender \* Physical\_weakness Crosstabulation

|        |                 |                 | Physical_weakness |       | Total  |
|--------|-----------------|-----------------|-------------------|-------|--------|
|        |                 |                 | yes               | no    |        |
| Gender | male            | Count           | 42                | 180   | 222    |
|        |                 | Expected Count  | 34.7              | 187.3 | 222.0  |
|        |                 | % within Gender | 18.9%             | 81.1% | 100.0% |
|        | female          | Count           | 8                 | 90    | 98     |
|        |                 | Expected Count  | 15.3              | 82.7  | 98.0   |
|        |                 | % within Gender | 8.2%              | 91.8% | 100.0% |
| Total  | Count           |                 | 50                | 270   | 320    |
|        | Expected Count  |                 | 50.0              | 270.0 | 320.0  |
|        | % within Gender |                 | 15.6%             | 84.4% | 100.0% |

Table S27. Chi-Square Tests

|                                    | Value              | df | Asymp. Sig. (2-sided) | Exact Sig. (2-sided) | Exact Sig. (1-sided) |
|------------------------------------|--------------------|----|-----------------------|----------------------|----------------------|
| Pearson Chi-Square                 | 5.966 <sup>a</sup> | 1  | .015                  | .018                 | .009                 |
| Continuity Correction <sup>b</sup> | 5.178              | 1  | .023                  |                      |                      |
| Likelihood Ratio                   | 6.598              | 1  | .010                  |                      |                      |
| Fisher's Exact Test                |                    |    |                       |                      |                      |
| Linear-by-Linear Association       | 5.947              | 1  | .015                  |                      |                      |
| N of Valid Cases <sup>b</sup>      | 320                |    |                       |                      |                      |

a. 0 cells (.0%) have expected count less than 5. The minimum expected count is 15.31.

Table S28. Symmetric Measures

|                        | Value | Approx. Sig. |
|------------------------|-------|--------------|
| Nominal by Nominal Phi | .137  | .015         |
| Cramer's V             | .137  | .015         |
| N of Valid Cases       | 320   |              |

Table S29. Case Processing Summary

|                       | Cases                |         |         |         |         |         |
|-----------------------|----------------------|---------|---------|---------|---------|---------|
|                       | Valid                |         | Missing |         | Total   |         |
|                       | N                    | Percent | N       | Percent | N       | Percent |
| Gender * Helplessness | 3.200E2 <sup>a</sup> | 100.0%  | 0       | .0%     | 319.998 | 100.0%  |

a. Number of valid cases is different from the total count in the crosstabulation table because the cell counts have been rounded.

Table S30. Gender \* Helplessness Crosstabulation

|        |                 |                 | Helplessness |       | Total  |
|--------|-----------------|-----------------|--------------|-------|--------|
|        |                 |                 | yes          | no    |        |
| Gender | male            | Count           | 31           | 191   | 222    |
|        |                 | Expected Count  | 25.7         | 196.3 | 222.0  |
|        |                 | % within Gender | 14.0%        | 86.0% | 100.0% |
|        | female          | Count           | 6            | 92    | 98     |
|        |                 | Expected Count  | 11.3         | 86.7  | 98.0   |
|        |                 | % within Gender | 6.1%         | 93.9% | 100.0% |
| Total  | Count           |                 | 37           | 283   | 320    |
|        | Expected Count  |                 | 37.0         | 283.0 | 320.0  |
|        | % within Gender |                 | 11.6%        | 88.4% | 100.0% |

Table S31. Chi-Square Tests

|                                    | Value              | df | Asymp. Sig. (2-sided) | Exact Sig. (2-sided) | Exact Sig. (1-sided) |
|------------------------------------|--------------------|----|-----------------------|----------------------|----------------------|
| Pearson Chi-Square                 | 4.088 <sup>a</sup> | 1  | .043                  | .057                 | .029                 |
| Continuity Correction <sup>b</sup> | 3.357              | 1  | .067                  |                      |                      |
| Likelihood Ratio                   | 4.538              | 1  | .033                  |                      |                      |
| Fisher's Exact Test                |                    |    |                       |                      |                      |
| Linear-by-Linear Association       | 4.076              | 1  | .044                  |                      |                      |
| N of Valid Cases <sup>b</sup>      | 320                |    |                       |                      |                      |

a. 0 cells (.0%) have expected count less than 5. The minimum expected count is 11.33.

Table S32. Symmetric Measures

|                    |                  | Value | Approx. Sig. |
|--------------------|------------------|-------|--------------|
| Nominal by Nominal | Phi              | .113  | .043         |
|                    | Cramer's V       | .113  | .043         |
|                    | N of Valid Cases | 320   |              |

Table S33. Case Processing Summary

|                               | Cases                |         |         |         |         |         |
|-------------------------------|----------------------|---------|---------|---------|---------|---------|
|                               | Valid                |         | Missing |         | Total   |         |
|                               | N                    | Percent | N       | Percent | N       | Percent |
| Gender * Nervousness_and_fear | 3.200E2 <sup>a</sup> | 100.0%  | 0       | .0%     | 319.998 | 100.0%  |

a. Number of valid cases is different from the total count in the crosstabulation table because the cell counts have been rounded.

Table S34. Gender \* Nervousness\_and\_fear Crosstabulation

|        |                 |                 | Nervousness_and_fear |       | Total  |
|--------|-----------------|-----------------|----------------------|-------|--------|
|        |                 |                 | yes                  | no    |        |
| Gender | male            | Count           | 46                   | 176   | 222    |
|        |                 | Expected Count  | 38.2                 | 183.8 | 222.0  |
|        |                 | % within Gender | 20.7%                | 79.3% | 100.0% |
|        | female          | Count           | 9                    | 89    | 98     |
|        |                 | Expected Count  | 16.8                 | 81.2  | 98.0   |
|        |                 | % within Gender | 9.2%                 | 90.8% | 100.0% |
| Total  | Count           |                 | 55                   | 265   | 320    |
|        | Expected Count  |                 | 55.0                 | 265.0 | 320.0  |
|        | % within Gender |                 | 17.2%                | 82.8% | 100.0% |

Table S35. Chi-Square Tests

|                                    | Value              | df | Asymp. Sig. (2-sided) | Exact Sig. (2-sided) | Exact Sig. (1-sided) |
|------------------------------------|--------------------|----|-----------------------|----------------------|----------------------|
| Pearson Chi-Square                 | 6.358 <sup>a</sup> | 1  | .012                  | .015                 | .007                 |
| Continuity Correction <sup>b</sup> | 5.573              | 1  | .018                  |                      |                      |
| Likelihood Ratio                   | 6.992              | 1  | .008                  |                      |                      |
| Fisher's Exact Test                |                    |    |                       |                      |                      |
| Linear-by-Linear Association       | 6.338              | 1  | .012                  |                      |                      |
| N of Valid Cases <sup>b</sup>      | 320                |    |                       |                      |                      |

a. 0 cells (.0%) have expected count less than 5. The minimum expected count is 16.84.

Table S36. Symmetric Measures

|                        | Value | Approx. Sig. |
|------------------------|-------|--------------|
| Nominal by Nominal Phi | .141  | .012         |
| Cramer's V             | .141  | .012         |
| N of Valid Cases       | 320   |              |

Table S37. Case Processing Summary

|                                                                | Cases |         |         |         |       |         |
|----------------------------------------------------------------|-------|---------|---------|---------|-------|---------|
|                                                                | Valid |         | Missing |         | Total |         |
|                                                                | N     | Percent | N       | Percent | N     | Percent |
| Gender *<br>Physical_and_social_setting_of_women_health_issues | 320   | 100.0%  | 0       | .0%     | 320   | 100.0%  |

Table S38. Gender \* Physical\_and\_social\_setting\_of\_women\_health\_issues Crosstabulation

|        |                 |                 | Physical_and_social_setting_of_women_health_issues |       | Total  |
|--------|-----------------|-----------------|----------------------------------------------------|-------|--------|
|        |                 |                 | yes                                                | no    |        |
| Gender | male            | Count           | 67                                                 | 155   | 222    |
|        |                 | Expected Count  | 55.5                                               | 166.5 | 222.0  |
|        |                 | % within Gender | 30.2%                                              | 69.8% | 100.0% |
|        | female          | Count           | 13                                                 | 85    | 98     |
|        |                 | Expected Count  | 24.5                                               | 73.5  | 98.0   |
|        |                 | % within Gender | 13.3%                                              | 86.7% | 100.0% |
| Total  | Count           |                 | 80                                                 | 240   | 320    |
|        | Expected Count  |                 | 80.0                                               | 240.0 | 320.0  |
|        | % within Gender |                 | 25.0%                                              | 75.0% | 100.0% |

Table S39. Chi-Square Tests

|                                    | Value               | df | Asymp. Sig. (2-sided) | Exact Sig. (2-sided) | Exact Sig. (1-sided) |
|------------------------------------|---------------------|----|-----------------------|----------------------|----------------------|
| Pearson Chi-Square                 | 10.374 <sup>a</sup> | 1  | .001                  | .001                 | .001                 |
| Continuity Correction <sup>b</sup> | 9.492               | 1  | .002                  |                      |                      |
| Likelihood Ratio                   | 11.282              | 1  | .001                  |                      |                      |
| Fisher's Exact Test                |                     |    |                       |                      |                      |
| Linear-by-Linear Association       | 10.342              | 1  | .001                  |                      |                      |
| N of Valid Cases <sup>b</sup>      | 320                 |    |                       |                      |                      |

a. 0 cells (.0%) have expected count less than 5. The minimum expected count is 24.50.

Table S40. Symmetric Measures

|                    |                  | Value | Approx. Sig. |
|--------------------|------------------|-------|--------------|
| Nominal by Nominal | Phi              | .180  | .001         |
|                    | Cramer's V       | .180  | .001         |
|                    | N of Valid Cases | 320   |              |

Table S41. Case Processing Summary

|                             | Cases                |         |         |          |         |         |
|-----------------------------|----------------------|---------|---------|----------|---------|---------|
|                             | Valid                |         | Missing |          | Total   |         |
|                             | N                    | Percent | N       | Percent  | N       | Percent |
| Gender * Womens_triple_role | 3.200E2 <sup>a</sup> | 100.0%  | .000    | 1.8E-14% | 319.998 | 100.0%  |

a. Number of valid cases is different from the total count in the crosstabulation table because the cell counts have been rounded.

Table S42. Gender \* Womens\_triple\_role Crosstabulation

|        |        |                 | Womens_triple_role |       | Total  |
|--------|--------|-----------------|--------------------|-------|--------|
|        |        |                 | yes                | no    |        |
| Gender | male   | Count           | 63                 | 159   | 222    |
|        |        | Expected Count  | 52.0               | 170.0 | 222.0  |
|        |        | % within Gender | 28.4%              | 71.6% | 100.0% |
|        | female | Count           | 12                 | 86    | 98     |
|        |        | Expected Count  | 23.0               | 75.0  | 98.0   |
|        |        | % within Gender | 12.2%              | 87.8% | 100.0% |
|        | Total  | Count           | 75                 | 245   | 320    |
|        |        | Expected Count  | 75.0               | 245.0 | 320.0  |
|        |        | % within Gender | 23.4%              | 76.6% | 100.0% |

Table S43. Chi-Square Tests

|                                    | Value              | df | Asymp. Sig. (2-sided) | Exact Sig. (2-sided) | Exact Sig. (1-sided) |
|------------------------------------|--------------------|----|-----------------------|----------------------|----------------------|
| Pearson Chi-Square                 | 9.862 <sup>a</sup> | 1  | .002                  | .002                 | .001                 |
| Continuity Correction <sup>b</sup> | 8.983              | 1  | .003                  |                      |                      |
| Likelihood Ratio                   | 10.775             | 1  | .001                  |                      |                      |
| Fisher's Exact Test                |                    |    |                       |                      |                      |
| Linear-by-Linear Association       | 9.831              | 1  | .002                  |                      |                      |
| N of Valid Cases <sup>b</sup>      | 320                |    |                       |                      |                      |

a. 0 cells (.0%) have expected count less than 5. The minimum expected count is 22.97.

Table S44. Symmetric Measures

|                    |                  | Value | Approx. Sig. |
|--------------------|------------------|-------|--------------|
| Nominal by Nominal | Phi              | .176  | .002         |
|                    | Cramer's V       | .176  | .002         |
|                    | N of Valid Cases | 320   |              |

Table S45. Case Processing Summary

|                                                   | Cases                |         |         |         |         |         |
|---------------------------------------------------|----------------------|---------|---------|---------|---------|---------|
|                                                   | Valid                |         | Missing |         | Total   |         |
|                                                   | N                    | Percent | N       | Percent | N       | Percent |
| Gender *<br>Womens_economic_livelihood_or_poverty | 3.200E2 <sup>a</sup> | 100.0%  | 0       | .0%     | 319.998 | 100.0%  |

a. Number of valid cases is different from the total count in the crosstabulation table because the cell counts have been rounded.

Table S46. Gender \* Womens\_economic\_livelihood\_or\_poverty Crosstabulation

|        |                 |                 | Womens_economic_livelihood_or_poverty |       | Total  |
|--------|-----------------|-----------------|---------------------------------------|-------|--------|
|        |                 |                 | yes                                   | no    |        |
| Gender | male            | Count           | 54                                    | 168   | 222    |
|        |                 | Expected Count  | 45.1                                  | 176.9 | 222.0  |
|        |                 | % within Gender | 24.3%                                 | 75.7% | 100.0% |
|        | female          | Count           | 11                                    | 87    | 98     |
|        |                 | Expected Count  | 19.9                                  | 78.1  | 98.0   |
|        |                 | % within Gender | 11.2%                                 | 88.8% | 100.0% |
| Total  | Count           |                 | 65                                    | 255   | 320    |
|        | Expected Count  |                 | 65.0                                  | 255.0 | 320.0  |
|        | % within Gender |                 | 20.3%                                 | 79.7% | 100.0% |

Table S47. Chi-Square Tests

|                                    | Value              | df | Asymp. Sig. (2-sided) | Exact Sig. (2-sided) | Exact Sig. (1-sided) |
|------------------------------------|--------------------|----|-----------------------|----------------------|----------------------|
| Pearson Chi-Square                 | 7.208 <sup>a</sup> | 1  | .007                  | .007                 | .004                 |
| Continuity Correction <sup>b</sup> | 6.421              | 1  | .011                  |                      |                      |
| Likelihood Ratio                   | 7.852              | 1  | .005                  |                      |                      |
| Fisher's Exact Test                |                    |    |                       |                      |                      |
| Linear-by-Linear Association       | 7.185              | 1  | .007                  |                      |                      |
| N of Valid Cases <sup>b</sup>      | 320                |    |                       |                      |                      |

a. 0 cells (.0%) have expected count less than 5. The minimum expected count is 19.91.

Table S48. Symmetric Measures

|                    | Value      | Approx. Sig. |
|--------------------|------------|--------------|
| Nominal by Nominal | Phi        | .150         |
|                    | Cramer's V | .150         |
| N of Valid Cases   | 320        |              |

Table S49. Case Processing Summary

|                                                                      | Cases                |         |         |         |         |         |
|----------------------------------------------------------------------|----------------------|---------|---------|---------|---------|---------|
|                                                                      | Valid                |         | Missing |         | Total   |         |
|                                                                      | N                    | Percent | N       | Percent | N       | Percent |
| Gender *<br>After_hazards_income_and_occupation_challenges_for_women | 3.200E2 <sup>a</sup> | 100.0%  | 0       | .0%     | 319.998 | 100.0%  |

a. Number of valid cases is different from the total count in the crosstabulation table because the cell counts have been rounded.

Table S50. Gender \* After\_hazards\_income\_and\_occupation\_challenges\_for\_women Crosstabulation

|        |                 |                 | After_hazards_income_and_occupation_challenges_for_women |       | Total  |
|--------|-----------------|-----------------|----------------------------------------------------------|-------|--------|
|        |                 |                 | yes                                                      | no    |        |
| Gender | male            | Count           | 59                                                       | 163   | 222    |
|        |                 | Expected Count  | 48.6                                                     | 173.4 | 222.0  |
|        |                 | % within Gender | 26.6%                                                    | 73.4% | 100.0% |
|        | female          | Count           | 11                                                       | 87    | 98     |
|        |                 | Expected Count  | 21.4                                                     | 76.6  | 98.0   |
|        |                 | % within Gender | 11.2%                                                    | 88.8% | 100.0% |
| Total  | Count           |                 | 70                                                       | 250   | 320    |
|        | Expected Count  |                 | 70.0                                                     | 250.0 | 320.0  |
|        | % within Gender |                 | 21.9%                                                    | 78.1% | 100.0% |

Table S51. Chi-Square Tests

|                                    | Value              | df | Asymp. Sig. (2-sided) | Exact Sig. (2-sided) | Exact Sig. (1-sided) |
|------------------------------------|--------------------|----|-----------------------|----------------------|----------------------|
| Pearson Chi-Square                 | 9.376 <sup>a</sup> | 1  | .002                  | .002                 | .001                 |
| Continuity Correction <sup>b</sup> | 8.499              | 1  | .004                  |                      |                      |
| Likelihood Ratio                   | 10.297             | 1  | .001                  |                      |                      |
| Fisher's Exact Test                |                    |    |                       |                      |                      |
| Linear-by-Linear Association       | 9.347              | 1  | .002                  |                      |                      |
| N of Valid Cases <sup>b</sup>      | 320                |    |                       |                      |                      |

a. 0 cells (.0%) have expected count less than 5. The minimum expected count is 21.44.

Table S52. Symmetric Measures

|                    |                  | Value | Approx. Sig. |
|--------------------|------------------|-------|--------------|
| Nominal by Nominal | Phi              | .171  | .002         |
|                    | Cramer's V       | .171  | .002         |
|                    | N of Valid Cases | 320   |              |

Table S53. Case Processing Summary

|                                            | Cases                |         |         |         |         |         |
|--------------------------------------------|----------------------|---------|---------|---------|---------|---------|
|                                            | Valid                |         | Missing |         | Total   |         |
|                                            | N                    | Percent | N       | Percent | N       | Percent |
| Gender *<br>Inadequacy_of_shelter_capacity | 3.200E2 <sup>a</sup> | 100.0%  | 0       | .0%     | 319.998 | 100.0%  |

a. Number of valid cases is different from the total count in the crosstabulation table because the cell counts have been rounded.

Table S54. Gender \* Inadequacy\_of\_shelter\_capacity Crosstabulation

|        |        |                 | Inadequacy_of_shelter_capacity |       | Total  |
|--------|--------|-----------------|--------------------------------|-------|--------|
|        |        |                 | yes                            | no    |        |
| Gender | male   | Count           | 42                             | 180   | 222    |
|        |        | Expected Count  | 34.7                           | 187.3 | 222.0  |
|        |        | % within Gender | 18.9%                          | 81.1% | 100.0% |
|        | female | Count           | 8                              | 90    | 98     |
|        |        | Expected Count  | 15.3                           | 82.7  | 98.0   |
|        |        | % within Gender | 8.2%                           | 91.8% | 100.0% |
|        | Total  | Count           | 50                             | 270   | 320    |
|        |        | Expected Count  | 50.0                           | 270.0 | 320.0  |
|        |        | % within Gender | 15.6%                          | 84.4% | 100.0% |

Table S55. Chi-Square Tests

|                                    | Value              | df | Asymp. Sig. (2-sided) | Exact Sig. (2-sided) | Exact Sig. (1-sided) |
|------------------------------------|--------------------|----|-----------------------|----------------------|----------------------|
| Pearson Chi-Square                 | 5.966 <sup>a</sup> | 1  | .015                  | .018                 | .009                 |
| Continuity Correction <sup>b</sup> | 5.178              | 1  | .023                  |                      |                      |
| Likelihood Ratio                   | 6.598              | 1  | .010                  |                      |                      |
| Fisher's Exact Test                |                    |    |                       |                      |                      |
| Linear-by-Linear Association       | 5.947              | 1  | .015                  |                      |                      |
| N of Valid Cases <sup>b</sup>      | 320                |    |                       |                      |                      |

a. 0 cells (.0%) have expected count less than 5. The minimum expected count is 15.31.

Table S56. Symmetric Measures

|                    |                  | Value | Approx. Sig. |
|--------------------|------------------|-------|--------------|
| Nominal by Nominal | Phi              | .137  | .015         |
|                    | Cramer's V       | .137  | .015         |
|                    | N of Valid Cases | 320   |              |

Table S57. Case Processing Summary

|                                                     | Cases                |         |         |         |         |         |
|-----------------------------------------------------|----------------------|---------|---------|---------|---------|---------|
|                                                     | Valid                |         | Missing |         | Total   |         |
|                                                     | N                    | Percent | N       | Percent | N       | Percent |
| Gender *<br>Womens_participation_in_decision_making | 3.200E2 <sup>a</sup> | 100.0%  | 0       | .0%     | 319.998 | 100.0%  |

a. Number of valid cases is different from the total count in the crosstabulation table because the cell counts have been rounded.

Table S58. Gender \* Womens\_participation\_in\_decision\_making Crosstabulation

|        |                 |                 | Womens_participation_in_decision_making |       | Total  |
|--------|-----------------|-----------------|-----------------------------------------|-------|--------|
|        |                 |                 | yes                                     | no    |        |
| Gender | male            | Count           | 72                                      | 150   | 222    |
|        |                 | Expected Count  | 59.7                                    | 162.3 | 222.0  |
|        |                 | % within Gender | 32.4%                                   | 67.6% | 100.0% |
|        | female          | Count           | 14                                      | 84    | 98     |
|        |                 | Expected Count  | 26.3                                    | 71.7  | 98.0   |
|        |                 | % within Gender | 14.3%                                   | 85.7% | 100.0% |
| Total  | Count           |                 | 86                                      | 234   | 320    |
|        | Expected Count  |                 | 86.0                                    | 234.0 | 320.0  |
|        | % within Gender |                 | 26.9%                                   | 73.1% | 100.0% |

Table S59. Chi-Square Tests

|                                    | Value               | df | Asymp. Sig. (2-sided) | Exact Sig. (2-sided) | Exact Sig. (1-sided) |
|------------------------------------|---------------------|----|-----------------------|----------------------|----------------------|
| Pearson Chi-Square                 | 11.392 <sup>a</sup> | 1  | .001                  | .001                 | .000                 |
| Continuity Correction <sup>b</sup> | 10.488              | 1  | .001                  |                      |                      |
| Likelihood Ratio                   | 12.346              | 1  | .000                  |                      |                      |
| Fisher's Exact Test                |                     |    |                       |                      |                      |
| Linear-by-Linear Association       | 11.357              | 1  | .001                  |                      |                      |
| N of Valid Cases <sup>b</sup>      | 320                 |    |                       |                      |                      |

a. 0 cells (.0%) have expected count less than 5. The minimum expected count is 26.34.

Table S60. Symmetric Measures

|                    | Value | Approx. Sig. |
|--------------------|-------|--------------|
| Nominal by Nominal |       |              |
| Phi                | .189  | .001         |
| Cramer's V         | .189  | .001         |
| N of Valid Cases   | 320   |              |

Table S61. Case Processing Summary

|                                                                         | Cases |         |         |         |       |         |
|-------------------------------------------------------------------------|-------|---------|---------|---------|-------|---------|
|                                                                         | Valid |         | Missing |         | Total |         |
|                                                                         | N     | Percent | N       | Percent | N     | Percent |
| Gender *<br>Adaptation_measures_affect_difference_between_men_and_women | 320   | 100.0%  | 0       | .0%     | 320   | 100.0%  |

**Table S62. Gender \* Adaptation\_measures\_affect\_differently\_men\_and\_women Crosstabulation**

|        |                 |                 | Adaptation_measures_affect_differently_men_and_women |       |           | Total  |
|--------|-----------------|-----------------|------------------------------------------------------|-------|-----------|--------|
|        |                 |                 | yes                                                  | no    | dont know |        |
| Gender | male            | Count           | 178                                                  | 24    | 20        | 222    |
|        |                 | Expected Count  | 177.6                                                | 24.3  | 20.1      | 222.0  |
|        |                 | % within Gender | 80.2%                                                | 10.8% | 9.0%      | 100.0% |
|        | female          | Count           | 78                                                   | 11    | 9         | 98     |
|        |                 | Expected Count  | 78.4                                                 | 10.7  | 8.9       | 98.0   |
|        |                 | % within Gender | 79.6%                                                | 11.2% | 9.2%      | 100.0% |
| Total  | Count           | 256             | 35                                                   | 29    | 320       |        |
|        | Expected Count  | 256.0           | 35.0                                                 | 29.0  | 320.0     |        |
|        | % within Gender | 80.0%           | 10.9%                                                | 9.1%  | 100.0%    |        |

**Table S63. Chi-Square Tests**

|                              | Value             | df | Asymp. Sig. (2-sided) |
|------------------------------|-------------------|----|-----------------------|
| Pearson Chi-Square           | .016 <sup>a</sup> | 2  | .992                  |
| Likelihood Ratio             | .016              | 2  | .992                  |
| Linear-by-Linear Association | .010              | 1  | .920                  |
| N of Valid Cases             | 320               |    |                       |

a. 0 cells (.0%) have expected count less than 5. The minimum expected count is 8.88.

**Table S64. Symmetric Measures**

|                    |                  | Value | Approx. Sig. |
|--------------------|------------------|-------|--------------|
| Nominal by Nominal | Phi              | .007  | .992         |
|                    | Cramer's V       | .007  | .992         |
|                    | N of Valid Cases | 320   |              |

**Table S65. Case Processing Summary**

|                                                      | Cases |         |         |         |       |         |
|------------------------------------------------------|-------|---------|---------|---------|-------|---------|
|                                                      | Valid |         | Missing |         | Total |         |
|                                                      | N     | Percent | N       | Percent | N     | Percent |
| Frequency *                                          |       |         |         |         |       |         |
| Adaptation_measures_affect_differently_men_and_women | 320   | 100.0%  | 0       | .0%     | 320   | 100.0%  |

**Table S66. Frequency \* Adaptation\_measures\_affect\_differently\_men\_and\_women Crosstabulation**

|           |        |                    | Adaptation_measures_affect_differently_men_and_women |        |           | Total  |
|-----------|--------|--------------------|------------------------------------------------------|--------|-----------|--------|
|           |        |                    | yes                                                  | no     | dont know |        |
| Frequency | 8.832  | Count              | 0                                                    | 0      | 9         | 9      |
|           |        | Expected Count     | 7.2                                                  | 1.0    | .8        | 9.0    |
|           |        | % within Frequency | .0%                                                  | .0%    | 100.0%    | 100.0% |
|           | 10.784 | Count              | 0                                                    | 11     | 0         | 11     |
|           |        | Expected Count     | 8.8                                                  | 1.2    | 1.0       | 11.0   |
|           |        | % within Frequency | .0%                                                  | 100.0% | .0%       | 100.0% |
|           | 19.968 | Count              | 0                                                    | 0      | 20        | 20     |
|           |        | Expected Count     | 16.0                                                 | 2.2    | 1.8       | 20.0   |
|           |        | % within Frequency | .0%                                                  | .0%    | 100.0%    | 100.0% |
|           | 24.416 | Count              | 0                                                    | 24     | 0         | 24     |
|           |        | Expected Count     | 19.2                                                 | 2.6    | 2.2       | 24.0   |
|           |        | % within Frequency | .0%                                                  | 100.0% | .0%       | 100.0% |
|           | 78.4   | Count              | 78                                                   | 0      | 0         | 78     |
|           |        | Expected Count     | 62.4                                                 | 8.5    | 7.1       | 78.0   |
|           |        | % within Frequency | 100.0%                                               | .0%    | .0%       | 100.0% |
|           | 177.6  | Count              | 178                                                  | 0      | 0         | 178    |
|           |        | Expected Count     | 142.4                                                | 19.5   | 16.1      | 178.0  |
|           |        | % within Frequency | 100.0%                                               | .0%    | .0%       | 100.0% |
|           | Total  | Count              | 256                                                  | 35     | 29        | 320    |
|           |        | Expected Count     | 256.0                                                | 35.0   | 29.0      | 320.0  |
|           |        | % within Frequency | 80.0%                                                | 10.9%  | 9.1%      | 100.0% |

**Table S67. Chi-Square Tests**

|                              | Value                | df | Asymp. Sig. (2-sided) |
|------------------------------|----------------------|----|-----------------------|
| Pearson Chi-Square           | 6.400E2 <sup>a</sup> | 10 | .000                  |
| Likelihood Ratio             | 408.417              | 10 | .000                  |
| Linear-by-Linear Association | 172.685              | 1  | .000                  |
| N of Valid Cases             | 320                  |    |                       |

a. 8 cells (44.4%) have expected count less than 5. The minimum expected count is .82.

Table S68. Symmetric Measures

|                    |            | Value | Approx. Sig. |
|--------------------|------------|-------|--------------|
| Nominal by Nominal | Phi        | 1.414 | .000         |
|                    | Cramer's V | 1.000 | .000         |
| N of Valid Cases   |            | 320   |              |

Table S69. Case Processing Summary

|                                       | Cases                |         |         |         |         |         |
|---------------------------------------|----------------------|---------|---------|---------|---------|---------|
|                                       | Valid                |         | Missing |         | Total   |         |
|                                       | N                    | Percent | N       | Percent | N       | Percent |
| Gender *                              |                      |         |         |         |         |         |
| Female_empowerment_through_employment | 3.200E2 <sup>a</sup> | 100.0%  | 0       | .0%     | 319.980 | 100.0%  |

a. Number of valid cases is different from the total count in the crosstabulation table because the cell counts have been rounded.

Table S70. Gender \* Female\_empowerment\_through\_employment Crosstabulation

|        |                 |                 | Female_empowerment_through_employment |        | Total  |
|--------|-----------------|-----------------|---------------------------------------|--------|--------|
|        |                 |                 | nt                                    |        |        |
|        |                 |                 | yes                                   | no     |        |
| Gender | male            | Count           | 72                                    | 150    | 222    |
|        |                 | Expected Count  | 59.7                                  | 162.3  | 222.0  |
|        |                 | % within Gender | 32.4%                                 | 67.6%  | 100.0% |
|        | female          | Count           | 14                                    | 84     | 98     |
|        |                 | Expected Count  | 26.3                                  | 71.7   | 98.0   |
|        |                 | % within Gender | 14.3%                                 | 85.7%  | 100.0% |
| Total  | Count           | 86              | 234                                   | 320    |        |
|        | Expected Count  | 86.0            | 234.0                                 | 320.0  |        |
|        | % within Gender | 26.9%           | 73.1%                                 | 100.0% |        |

**Table S71. Chi-Square Tests**

|                                    | Value               | df | Asymp. Sig. (2-sided) | Exact Sig. (2-sided) | Exact Sig. (1-sided) |
|------------------------------------|---------------------|----|-----------------------|----------------------|----------------------|
| Pearson Chi-Square                 | 11.392 <sup>a</sup> | 1  | .001                  | .001                 | .000                 |
| Continuity Correction <sup>b</sup> | 10.488              | 1  | .001                  |                      |                      |
| Likelihood Ratio                   | 12.346              | 1  | .000                  |                      |                      |
| Fisher's Exact Test                |                     |    |                       |                      |                      |
| Linear-by-Linear Association       | 11.357              | 1  | .001                  |                      |                      |
| N of Valid Cases <sup>b</sup>      | 320                 |    |                       |                      |                      |

a. 0 cells (.0%) have expected count less than 5. The minimum expected count is 26.34.

**Table S72. Symmetric Measures**

|                             | Value | Approx. Sig. |
|-----------------------------|-------|--------------|
| Nominal by Nominal      Phi | .189  | .001         |
| Cramer's V                  | .189  | .001         |
| N of Valid Cases            | 320   |              |

**Table S73. Case Processing Summary**

|                                        | Cases                |         |         |         |         |         |
|----------------------------------------|----------------------|---------|---------|---------|---------|---------|
|                                        | Valid                |         | Missing |         | Total   |         |
|                                        | N                    | Percent | N       | Percent | N       | Percent |
| Gender *<br>Women_friendly_agriculture | 3.200E2 <sup>a</sup> | 100.0%  | 0       | .0%     | 319.998 | 100.0%  |

a. Number of valid cases is different from the total count in the crosstabulation table because the cell counts have been rounded.

Table S74. Gender \* Women\_friendly\_agriculture Crosstabulation

|        |                 |                 | Women_friendly_agriculture |        | Total  |
|--------|-----------------|-----------------|----------------------------|--------|--------|
|        |                 |                 | yes                        | no     |        |
| Gender | male            | Count           | 31                         | 191    | 222    |
|        |                 | Expected Count  | 25.7                       | 196.3  | 222.0  |
|        |                 | % within Gender | 14.0%                      | 86.0%  | 100.0% |
|        | female          | Count           | 6                          | 92     | 98     |
|        |                 | Expected Count  | 11.3                       | 86.7   | 98.0   |
|        |                 | % within Gender | 6.1%                       | 93.9%  | 100.0% |
| Total  | Count           | 37              | 283                        | 320    |        |
|        | Expected Count  | 37.0            | 283.0                      | 320.0  |        |
|        | % within Gender | 11.6%           | 88.4%                      | 100.0% |        |

Table S75. Chi-Square Tests

|                                    | Value              | df | Asymp. Sig. (2-sided) | Exact Sig. (2-sided) | Exact Sig. (1-sided) |
|------------------------------------|--------------------|----|-----------------------|----------------------|----------------------|
| Pearson Chi-Square                 | 4.088 <sup>a</sup> | 1  | .043                  | .057                 | .029                 |
| Continuity Correction <sup>b</sup> | 3.357              | 1  | .067                  |                      |                      |
| Likelihood Ratio                   | 4.538              | 1  | .033                  |                      |                      |
| Fisher's Exact Test                |                    |    |                       |                      |                      |
| Linear-by-Linear Association       | 4.076              | 1  | .044                  |                      |                      |
| N of Valid Cases <sup>b</sup>      | 320                |    |                       |                      |                      |

a. 0 cells (.0%) have expected count less than 5. The minimum expected count is 11.33.

Table S76. Symmetric Measures

|                    |            | Value | Approx. Sig. |
|--------------------|------------|-------|--------------|
| Nominal by Nominal | Phi        | .113  | .043         |
|                    | Cramer's V | .113  | .043         |
| N of Valid Cases   |            | 320   |              |

**Table S77. Case Processing Summary**

|                                         | Cases                |         |         |         |         |         |
|-----------------------------------------|----------------------|---------|---------|---------|---------|---------|
|                                         | Valid                |         | Missing |         | Total   |         |
|                                         | N                    | Percent | N       | Percent | N       | Percent |
| Gender *                                |                      |         |         |         |         |         |
| Female_education_and_building_awareness | 3.200E2 <sup>a</sup> | 100.0%  | 0       | .0%     | 319.998 | 100.0%  |

a. Number of valid cases is different from the total count in the crosstabulation table because the cell counts have been rounded.

**Table S78. Gender \* Female\_education\_and\_building\_awareness Crosstabulation**

|        |        |                 | Female_education_and_building_awareness |       | Total  |
|--------|--------|-----------------|-----------------------------------------|-------|--------|
|        |        |                 | s                                       |       |        |
|        |        |                 | yes                                     | no    |        |
| Gender | male   | Count           | 58                                      | 164   | 222    |
|        |        | Expected Count  | 47.9                                    | 174.1 | 222.0  |
|        |        | % within Gender | 26.1%                                   | 73.9% | 100.0% |
|        | female | Count           | 11                                      | 87    | 98     |
|        |        | Expected Count  | 21.1                                    | 76.9  | 98.0   |
|        |        | % within Gender | 11.2%                                   | 88.8% | 100.0% |
|        | Total  | Count           | 69                                      | 251   | 320    |
|        |        | Expected Count  | 69.0                                    | 251.0 | 320.0  |
|        |        | % within Gender | 21.6%                                   | 78.4% | 100.0% |

**Table S79. Chi-Square Tests**

|                                    | Value              | df | Asymp. Sig. (2-sided) | Exact Sig. (2-sided) | Exact Sig. (1-sided) |
|------------------------------------|--------------------|----|-----------------------|----------------------|----------------------|
| Pearson Chi-Square                 | 8.926 <sup>a</sup> | 1  | .003                  | .003                 | .002                 |
| Continuity Correction <sup>b</sup> | 8.067              | 1  | .005                  |                      |                      |
| Likelihood Ratio                   | 9.788              | 1  | .002                  |                      |                      |
| Fisher's Exact Test                |                    |    |                       |                      |                      |
| Linear-by-Linear Association       | 8.898              | 1  | .003                  |                      |                      |
| N of Valid Cases <sup>b</sup>      | 320                |    |                       |                      |                      |

a. 0 cells (.0%) have expected count less than 5. The minimum expected count is 21.13.

**Table S80. Symmetric Measures**

|                             | Value | Approx. Sig. |
|-----------------------------|-------|--------------|
| Nominal by Nominal      Phi | .167  | .003         |
| Cramer's V                  | .167  | .003         |
| N of Valid Cases            | 320   |              |

**Table S81. Case Processing Summary**

|                        | Cases                |         |         |         |         |         |
|------------------------|----------------------|---------|---------|---------|---------|---------|
|                        | Valid                |         | Missing |         | Total   |         |
|                        | N                    | Percent | N       | Percent | N       | Percent |
| Gender * Micro_finance | 3.200E2 <sup>a</sup> | 100.0%  | 0       | .0%     | 319.998 | 100.0%  |

a. Number of valid cases is different from the total count in the crosstabulation table because the cell counts have been rounded.

**Table S82. Gender \* Micro\_finance Crosstabulation**

|        |                 |                 | Micro_finance |        | Total  |
|--------|-----------------|-----------------|---------------|--------|--------|
|        |                 |                 | yes           | no     |        |
| Gender | male            | Count           | 77            | 145    | 222    |
|        |                 | Expected Count  | 63.8          | 158.2  | 222.0  |
|        |                 | % within Gender | 34.7%         | 65.3%  | 100.0% |
|        | female          | Count           | 15            | 83     | 98     |
|        |                 | Expected Count  | 28.2          | 69.8   | 98.0   |
|        |                 | % within Gender | 15.3%         | 84.7%  | 100.0% |
| Total  | Count           | 92              | 228           | 320    |        |
|        | Expected Count  | 92.0            | 228.0         | 320.0  |        |
|        | % within Gender | 28.8%           | 71.2%         | 100.0% |        |

**Table S83. Chi-Square Tests**

|                                    | Value               | df | Asymp. Sig. (2-sided) | Exact Sig. (2-sided) | Exact Sig. (1-sided) |
|------------------------------------|---------------------|----|-----------------------|----------------------|----------------------|
| Pearson Chi-Square                 | 12.464 <sup>a</sup> | 1  | .000                  | .000                 | .000                 |
| Continuity Correction <sup>b</sup> | 11.536              | 1  | .001                  |                      |                      |
| Likelihood Ratio                   | 13.460              | 1  | .000                  |                      |                      |
| Fisher's Exact Test                |                     |    |                       |                      |                      |
| Linear-by-Linear Association       | 12.425              | 1  | .000                  |                      |                      |
| N of Valid Cases <sup>b</sup>      | 320                 |    |                       |                      |                      |

a. 0 cells (.0%) have expected count less than 5. The minimum expected count is 28.18.

**Table S84. Symmetric Measures**

|                             | Value | Approx. Sig. |
|-----------------------------|-------|--------------|
| Nominal by Nominal      Phi | .197  | .000         |
| Cramer's V                  | .197  | .000         |
| N of Valid Cases            | 320   |              |

**Table S85. Case Processing Summary**

|                                                        | Cases                |         |         |         |         |         |
|--------------------------------------------------------|----------------------|---------|---------|---------|---------|---------|
|                                                        | Valid                |         | Missing |         | Total   |         |
|                                                        | N                    | Percent | N       | Percent | N       | Percent |
| Gender *<br>Policy_formation_regarding_gender_equality | 3.200E2 <sup>a</sup> | 100.0%  | 0       | .0%     | 319.998 | 100.0%  |

a. Number of valid cases is different from the total count in the crosstabulation table because the cell counts have been rounded.

**Table S86. Gender \* Policy\_formation\_regarding\_gender\_equality Crosstabulation**

|        |                 |                 | Policy_formation_regarding_gender_equality |        | Total  |
|--------|-----------------|-----------------|--------------------------------------------|--------|--------|
|        |                 |                 | yes                                        | no     |        |
| Gender | male            | Count           | 24                                         | 198    | 222    |
|        |                 | Expected Count  | 20.1                                       | 201.9  | 222.0  |
|        |                 | % within Gender | 10.8%                                      | 89.2%  | 100.0% |
|        | female          | Count           | 5                                          | 93     | 98     |
|        |                 | Expected Count  | 8.9                                        | 89.1   | 98.0   |
|        |                 | % within Gender | 5.1%                                       | 94.9%  | 100.0% |
| Total  | Count           | 29              | 291                                        | 320    |        |
|        | Expected Count  | 29.0            | 291.0                                      | 320.0  |        |
|        | % within Gender | 9.1%            | 90.9%                                      | 100.0% |        |

**Table S87. Chi-Square Tests**

|                                    | Value              | df | Asymp. Sig. (2-sided) | Exact Sig. (2-sided) | Exact Sig. (1-sided) |
|------------------------------------|--------------------|----|-----------------------|----------------------|----------------------|
| Pearson Chi-Square                 | 2.689 <sup>a</sup> | 1  | .101                  | .138                 | .072                 |
| Continuity Correction <sup>b</sup> | 2.040              | 1  | .153                  |                      |                      |
| Likelihood Ratio                   | 2.964              | 1  | .085                  |                      |                      |
| Fisher's Exact Test                |                    |    |                       |                      |                      |
| Linear-by-Linear Association       | 2.680              | 1  | .102                  |                      |                      |
| N of Valid Cases <sup>b</sup>      | 320                |    |                       |                      |                      |

a. 0 cells (.0%) have expected count less than 5. The minimum expected count is 8.88.

**Table S88. Symmetric Measures**

|                    |            | Value | Approx. Sig. |
|--------------------|------------|-------|--------------|
| Nominal by Nominal | Phi        | .092  | .101         |
|                    | Cramer's V | .092  | .101         |
| N of Valid Cases   |            | 320   |              |

Table S89. Case Processing Summary

|                                                  | Cases                |         |         |         |         |         |
|--------------------------------------------------|----------------------|---------|---------|---------|---------|---------|
|                                                  | Valid                |         | Missing |         | Total   |         |
|                                                  | N                    | Percent | N       | Percent | N       | Percent |
| Gender *                                         |                      |         |         |         |         |         |
| Ensuring_women_participation_in_idea_development | 3.200E2 <sup>a</sup> | 100.0%  | 0       | .0%     | 319.998 | 100.0%  |

a. Number of valid cases is different from the total count in the crosstabulation table because the cell counts have been rounded.

Table S90. Gender \* Ensuring\_women\_participation\_in\_idea\_development Crosstabulation

|        |                 |                 | Ensuring_women_participation_in_idea_development |       | Total  |
|--------|-----------------|-----------------|--------------------------------------------------|-------|--------|
|        |                 |                 | yes                                              | no    |        |
| Gender | male            | Count           | 44                                               | 178   | 222    |
|        |                 | Expected Count  | 36.8                                             | 185.2 | 222.0  |
|        |                 | % within Gender | 19.8%                                            | 80.2% | 100.0% |
|        | female          | Count           | 9                                                | 89    | 98     |
|        |                 | Expected Count  | 16.2                                             | 81.8  | 98.0   |
|        |                 | % within Gender | 9.2%                                             | 90.8% | 100.0% |
| Total  | Count           |                 | 53                                               | 267   | 320    |
|        | Expected Count  |                 | 53.0                                             | 267.0 | 320.0  |
|        | % within Gender |                 | 16.6%                                            | 83.4% | 100.0% |

Table S91. Chi-Square Tests

|                                    | Value              | df | Asymp. Sig. (2-sided) | Exact Sig. (2-sided) | Exact Sig. (1-sided) |
|------------------------------------|--------------------|----|-----------------------|----------------------|----------------------|
| Pearson Chi-Square                 | 5.566 <sup>a</sup> | 1  | .018                  | .022                 | .012                 |
| Continuity Correction <sup>b</sup> | 4.823              | 1  | .028                  |                      |                      |
| Likelihood Ratio                   | 6.092              | 1  | .014                  |                      |                      |
| Fisher's Exact Test                |                    |    |                       |                      |                      |
| Linear-by-Linear Association       | 5.548              | 1  | .018                  |                      |                      |
| N of Valid Cases <sup>b</sup>      | 320                |    |                       |                      |                      |

a. 0 cells (.0%) have expected count less than 5. The minimum expected count is 16.23.

**Table S92. Symmetric Measures**

|                    |            | Value | Approx. Sig. |
|--------------------|------------|-------|--------------|
| Nominal by Nominal | Phi        | .132  | .018         |
|                    | Cramer's V | .132  | .018         |
| N of Valid Cases   |            | 320   |              |

**Table S93. Case Processing Summary**

|                               | Cases                |         |         |         |         |         |
|-------------------------------|----------------------|---------|---------|---------|---------|---------|
|                               | Valid                |         | Missing |         | Total   |         |
|                               | N                    | Percent | N       | Percent | N       | Percent |
| Gender * Climate_change_nexus | 3.200E2 <sup>a</sup> | 100.0%  | 0       | .0%     | 319.999 | 100.0%  |

a. Number of valid cases is different from the total count in the crosstabulation table because the cell counts have been rounded.

**Table S94. Gender \* Climate\_change\_nexus Crosstabulation**

|        |                 |                 | Climate_change_nexus |       | Total  |
|--------|-----------------|-----------------|----------------------|-------|--------|
|        |                 |                 | yes                  | no    |        |
| Gender | male            | Count           | 66                   | 156   | 222    |
|        |                 | Expected Count  | 54.8                 | 167.2 | 222.0  |
|        |                 | % within Gender | 29.7%                | 70.3% | 100.0% |
|        | female          | Count           | 13                   | 85    | 98     |
|        |                 | Expected Count  | 24.2                 | 73.8  | 98.0   |
|        |                 | % within Gender | 13.3%                | 86.7% | 100.0% |
| Total  | Count           |                 | 79                   | 241   | 320    |
|        | Expected Count  |                 | 79.0                 | 241.0 | 320.0  |
|        | % within Gender |                 | 24.7%                | 75.3% | 100.0% |

Table S95. Chi-Square Tests

|                                    | Value              | df | Asymp. Sig. (2-sided) | Exact Sig. (2-sided) | Exact Sig. (1-sided) |
|------------------------------------|--------------------|----|-----------------------|----------------------|----------------------|
| Pearson Chi-Square                 | 9.912 <sup>a</sup> | 1  | .002                  | .002                 | .001                 |
| Continuity Correction <sup>b</sup> | 9.047              | 1  | .003                  |                      |                      |
| Likelihood Ratio                   | 10.767             | 1  | .001                  |                      |                      |
| Fisher's Exact Test                |                    |    |                       |                      |                      |
| Linear-by-Linear Association       | 9.881              | 1  | .002                  |                      |                      |
| N of Valid Cases <sup>b</sup>      | 320                |    |                       |                      |                      |

a. 0 cells (.0%) have expected count less than 5. The minimum expected count is 24.19.

Table S96. Symmetric Measures

|                             | Value | Approx. Sig. |
|-----------------------------|-------|--------------|
| Nominal by Nominal      Phi | .176  | .002         |
| Cramer's V                  | .176  | .002         |
| N of Valid Cases            | 320   |              |

Table S97. Case Processing Summary

|                                                                             | Cases                |         |         |         |         |         |
|-----------------------------------------------------------------------------|----------------------|---------|---------|---------|---------|---------|
|                                                                             | Valid                |         | Missing |         | Total   |         |
|                                                                             | N                    | Percent | N       | Percent | N       | Percent |
| Gender *<br>Integrate_climate_change_informati<br>on_in_academic_curriculum | 3.200E2 <sup>a</sup> | 100.0%  | 0       | .0%     | 319.998 | 100.0%  |

a. Number of valid cases is different from the total count in the crosstabulation table because the cell counts have been rounded.

**Table S98. Gender \* Integrate\_climate\_change\_information\_in\_academic\_curriculum Crosstabulation**

|        |                 |                 | Integrate_climate_change_information_in_academic_curriculum |        | Total  |
|--------|-----------------|-----------------|-------------------------------------------------------------|--------|--------|
|        |                 |                 | yes                                                         | no     |        |
| Gender | male            | Count           | 25                                                          | 197    | 222    |
|        |                 | Expected Count  | 20.8                                                        | 201.2  | 222.0  |
|        |                 | % within Gender | 11.3%                                                       | 88.7%  | 100.0% |
|        | female          | Count           | 5                                                           | 93     | 98     |
|        |                 | Expected Count  | 9.2                                                         | 88.8   | 98.0   |
|        |                 | % within Gender | 5.1%                                                        | 94.9%  | 100.0% |
| Total  | Count           | 30              | 290                                                         | 320    |        |
|        | Expected Count  | 30.0            | 290.0                                                       | 320.0  |        |
|        | % within Gender | 9.4%            | 90.6%                                                       | 100.0% |        |

**Table S99. Chi-Square Tests**

|                                    | Value              | df | Asymp. Sig. (2-sided) | Exact Sig. (2-sided) | Exact Sig. (1-sided) |
|------------------------------------|--------------------|----|-----------------------|----------------------|----------------------|
| Pearson Chi-Square                 | 3.036 <sup>a</sup> | 1  | .081                  | .097                 | .058                 |
| Continuity Correction <sup>b</sup> | 2.354              | 1  | .125                  |                      |                      |
| Likelihood Ratio                   | 3.364              | 1  | .067                  |                      |                      |
| Fisher's Exact Test                |                    |    |                       |                      |                      |
| Linear-by-Linear Association       | 3.026              | 1  | .082                  |                      |                      |
| N of Valid Cases <sup>b</sup>      | 320                |    |                       |                      |                      |

a. 0 cells (.0%) have expected count less than 5. The minimum expected count is 9.19.

**Table S100. Symmetric Measures**

|                    |            | Value | Approx. Sig. |
|--------------------|------------|-------|--------------|
| Nominal by Nominal | Phi        | .097  | .081         |
|                    | Cramer's V | .097  | .081         |
| N of Valid Cases   |            | 320   |              |
